# Supplementary material
Source: HighWire-hosted journal article supplement (doi:10.1101/rna.080775.125)

**Supplemental Figure S3. Partitioning and conservation of the *Insr* 5'UTR**

**(A)** The *Insr* 5'UTR *in vitro* prediction from Figure 4A divided into domains with indexes indicated. The normalized DMS reactivity applies to all domains. **(B)** Simplified conservation tracks of the insulin receptor 5'UTR. Blue peaks: conservation among 30 mammals. Magnitude letters: conservation among 470 mammals. Top sequence: human. Bottom: mouse. RNA structure domains discussed in this report are annotated.

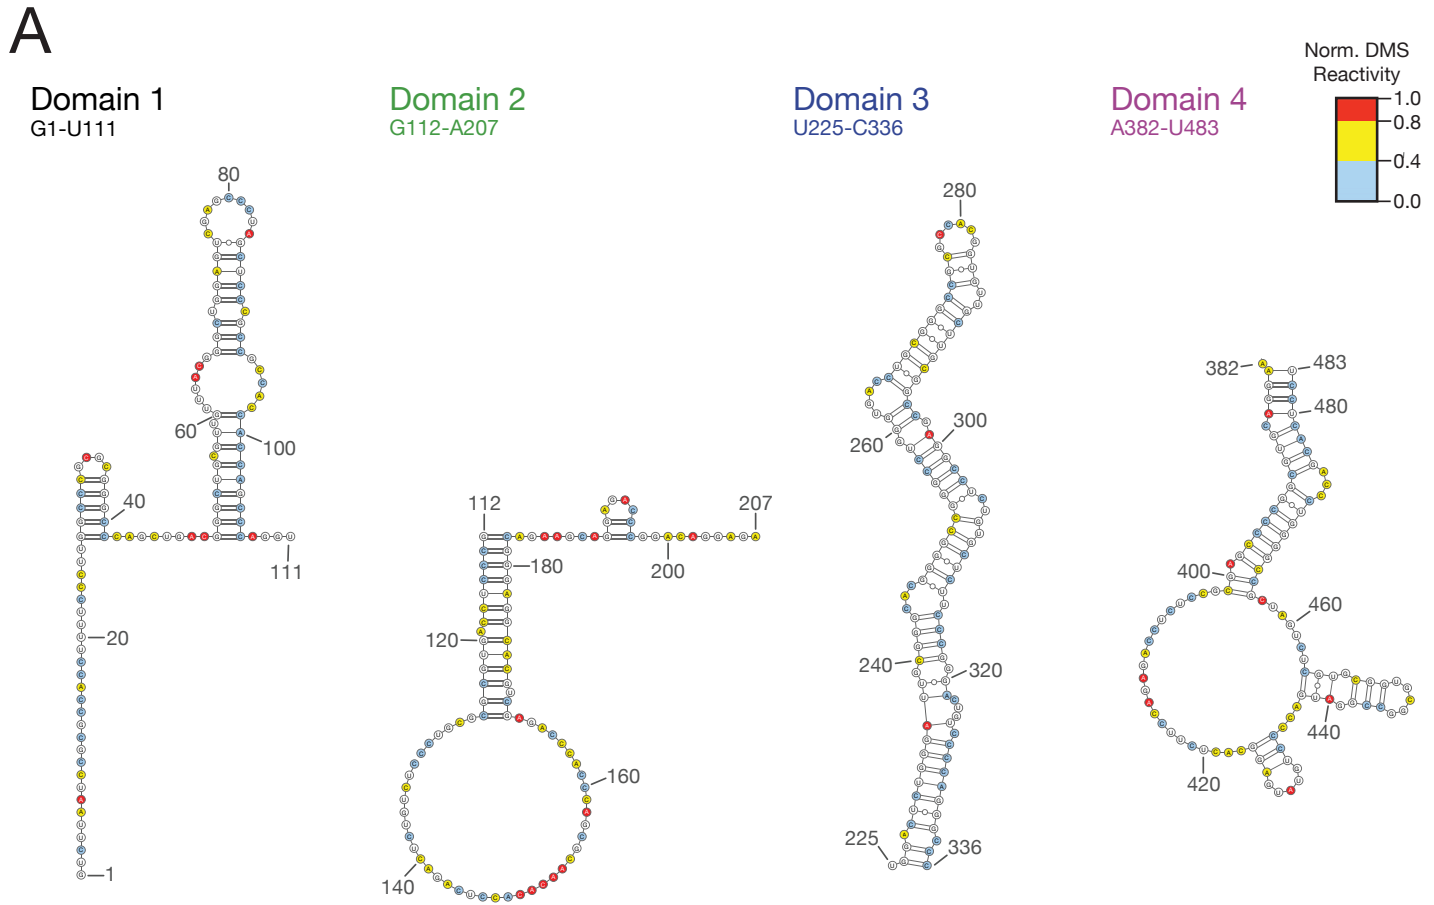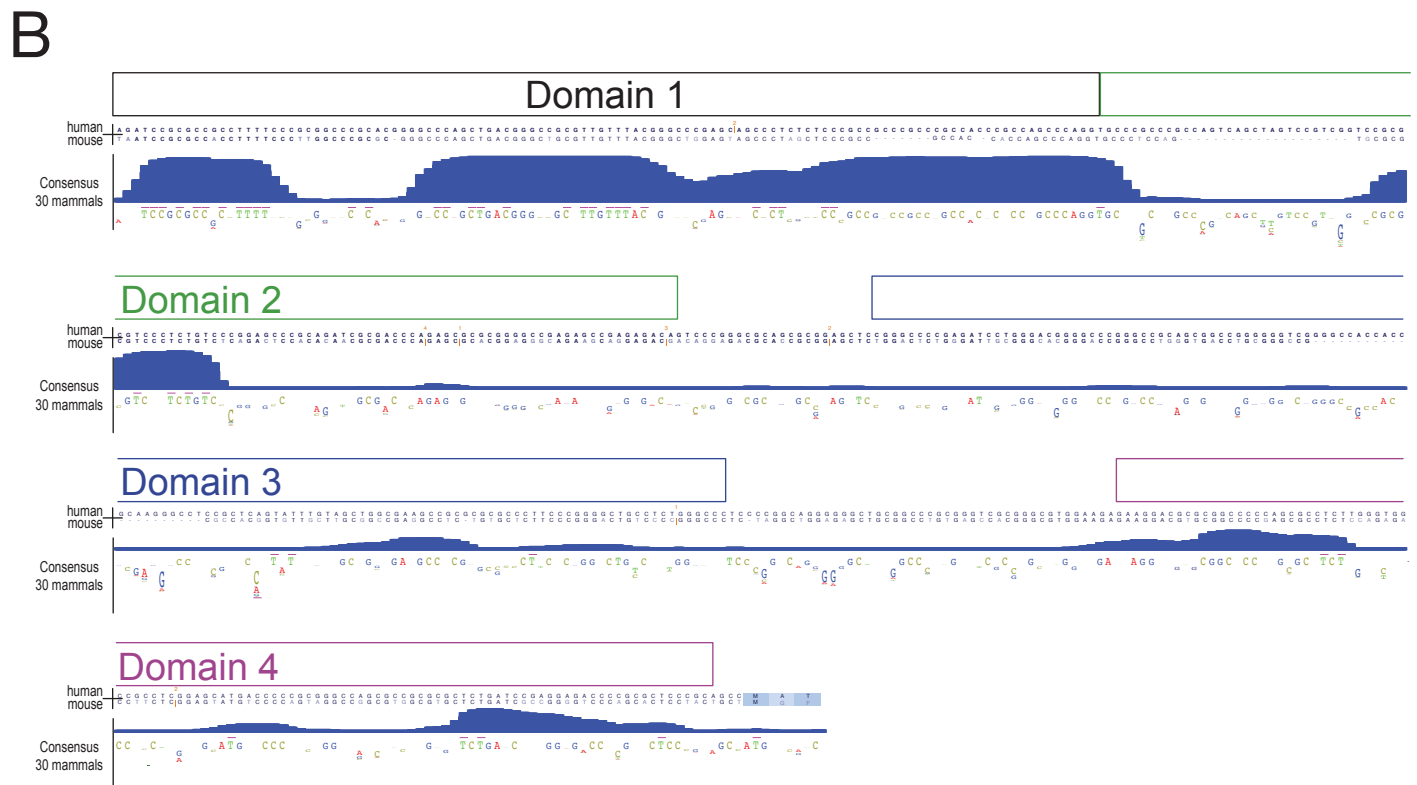

Supplement: Supplemental_Fig_S3.pdf [file Supplemental_Fig_S3.pdf]
