# Supplementary material
Source: HighWire-hosted journal article supplement (doi:10.1101/rna.080775.125)

### Supplemental Figure S6. All tetraloop hairpin mutants

**(A)** Bicistronic luciferase assay results from tetraloop hairpins walking down each of the predicted domains. Statistics: Tukey's HSD of each mutant compared to the full-length *Insr* 5'UTR \*\*\* =  $p < 0.0005$ , \*\* =  $p < 0.005$ , \* =  $p < 0.05$ . Not significant: ns. Location of mutations is depicted. **(B)** Diagram of these TLs' positions on the cellular model of the *Insr* 5'UTR. **(C)** Diagram of TL positions on the *in vitro* model of the *Insr* 5'UTR.

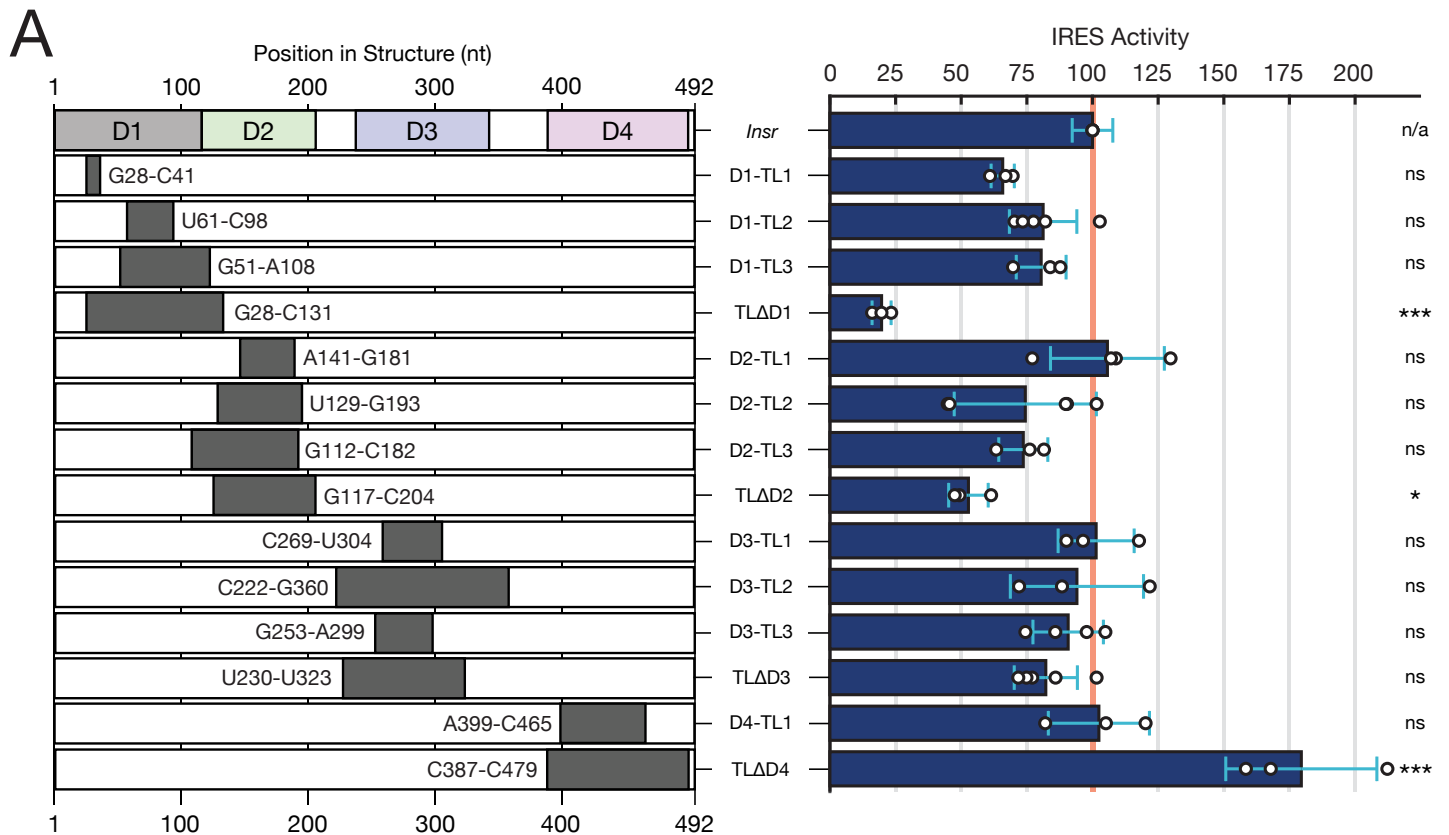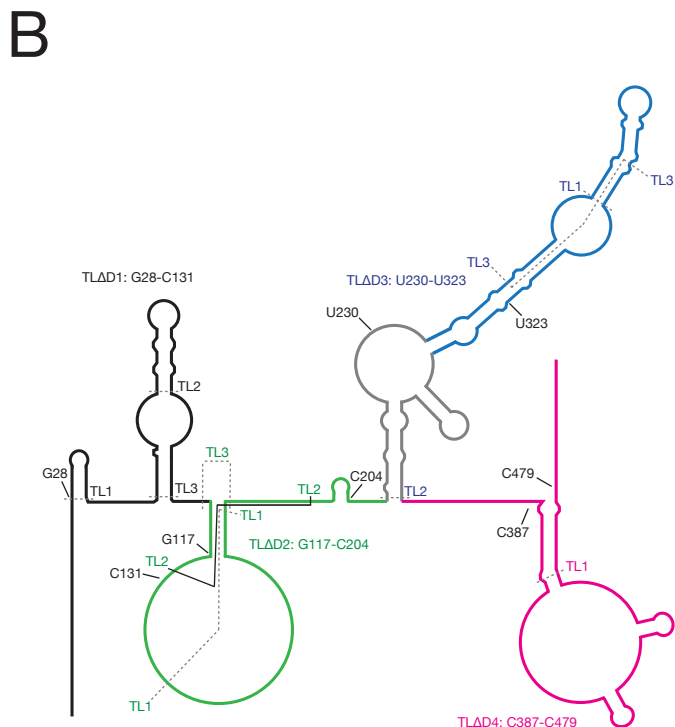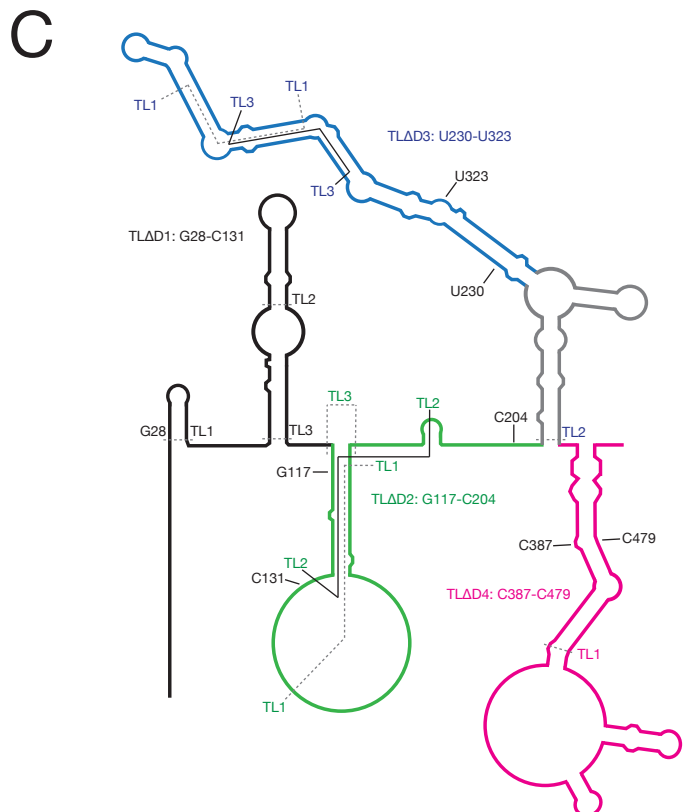

Supplement: Supplemental_Fig_S6.pdf [file Supplemental_Fig_S6.pdf]
