# Supplementary material
Source: HighWire-hosted journal article supplement (doi:10.1101/rna.080775.125)
Supplement: Supplemental_Legends.docx [file Supplemental_Legends.docx]

**Supplemental Figure S1. DMS-MaPseq analysis pipeline and quality control**

**(A)** The typical DMS-MaPseq analysis pipeline with an additional barcode splitting step added upstream to support the sequencing of many DMS-MaPseq fragments at once. **(B-E)** DMS-MaPseq data probing the HCV IRES in cells and *in vitro*. At left, representative scatterplots of mutation rates between two replicates in cells and *in vitro*, respectively. Red: As. Blue: Cs. Black: Gs and Us. At right, frequency histogram counting the number of mutations per 150x150 paired end reads. **(F-I)** In the same format, DMS-MaPseq data for the EMCV IRES probed in tandem in cells and *in vitro*. **(J-M)** DMS-MaPseq data for *Insr* probed as depicted in Figure 1. These data were used for secondary structure predictions.

**Supplemental Figure S2. Known structures of viral IRESes used for comparison**

**(A)** The known structure of the HCV IRES, reconstructed from (Kieft et al. 1999). This isolate differs by 4nt from the probed structure, annotated in the figure. Cellular DMS-MaPseq data is superimposed for comparison to show local melting around the labeled translation start codon. AUROC between this structure and DMS-MaPseq data both in cells and *in vitro* is indicated. **(B)** The known structure of the EMCV IRES, reconstructed from (Pilipenko et al. 1989). The probed structure includes adjacent domains (D, E, F, and M). AUROC comparisons of the known structure to *in vitro* and cellularDMS-MaPseq data are included, and these values are computed across the shared regions of structure between the two models. In cell DMS-MaPseq data from this study is superimposed. Indexes are consistent with the probed structures.

**Supplemental Figure S3. Partitioning and conservation of the *Insr* 5’UTR**

**(A)** The *Insr* 5’UTR *in vitro* prediction from Figure 4A divided into domains with indexes indicated. The normalized DMS reactivity applies to all domains. **(B)** Simplified conservation tracks of the insulin receptor 5’UTR. Blue peaks: conservation among 30 mammals. Magnitude letters: conservation among 470 mammals. Top sequence: human. Bottom: mouse. RNA structure domains discussed in this report are annotated.

**Supplemental Figure S4. RT-qPCR of the bicistronic reporters**

**(A**) Schematic of the bicistronic transcript RT-qPCR assay with probes diagrammed. HEX: Hexachlorofluorescein. BHQ1: Black Hole Quencher 1. FAM: 6-Carboxyfluorescein. Insert: assayed UTR placed between the Renilla (REN) and Firefly (FF) open reading frames (ORFs). HEX reports on REN and FAM reports on FF. **(B)** Efficiency plots of the probes under the assay conditions (see Methods). **(C)** Ratios of HEX (assaying the REN ORF) to FAM (assaying the FF ORF) across *Insr*, BG, and HCV controls, as well as 20 *Insr* variants presented in the manuscript. The error bars in (B) and (C) are the standard deviation of technical replicates.

**Supplemental Figure S5. Secondary structure is disrupted in all broad domain deletion mutants**

Related to Figure 5B. For each subfigure:at left, coefficient of determination between DMS signal of this mutant compared to full-length *Insr* 5’UTR across their shared sequence range, considering only signal on As and Cs, calculated in windows (see Methods). Center, mFMI comparison between the predicted structure and full-length. Right, the secondary structure model of the mutant. Indexes in the structures correspond to the mutant UTR, not full-length. The mutations and AUROC values are indicated with domains labeled. **(A)** DMS-MaPseq constrained model of ∆D1 in live cells. **(B)** DMS-MaPseq constrained model of ∆D2 in live cells. Modeled base-pairs removed for clarity are depicted (C373-C380 with (G133-G141). **(C)** DMS-MaPseq constrained model of ∆D3 in live cells.

**Supplemental Figure S6. All tetraloop hairpin mutants**

**(A)** Bicistronic luciferase assay results from tetraloop hairpins walking down each of the predicted domains. Statistics: Tukey’s HSD of each mutant compared to the full length *Insr* 5’UTR *** = p < 0.0005, ** = p < 0.005, * = p < 0.05. Not significant: ns. Location of mutations is depicted. **(B)** Diagram of these TLs’ positions on thecellularmodel of the *Insr* 5’UTR. **(C)** Diagram of TL positions on the *in vitro* model of the *Insr* 5’UTR.

**Supplemental Figure S7. Tetraloop hairpins rescue structure**

Related to Figure 5D. For each subfigure:at left, coefficient of determination between DMS signal of this mutant compared to full-length *Insr* 5’UTR across their shared sequence range, considering only signal on As and Cs, calculated in windows (see Methods). Center, mFMI comparison between the predicted structure and full-length. Right, the secondary structure model of the mutant. Indexes in the structures correspond to the mutant UTR, not full-length. **(A)** Cellular *s*tructure of TL∆D1, with all but D2 intact. **(B)** D1-TL3 repairs all surrounding structures in live cells compared to ∆D1 (in Supp. Figure S5A). **(C)** TL∆D2 in live cells, where all surrounding structure is restored compared to ∆D2 (in Supp. Figure S5B). Base-pairs removed for clarity (G11-C15 with G109-C113) are indicated. **(D)** D3-TL2 probed in live cells (which replaces more UTR than ∆D3) also reveals a structural rescue (∆D3 structure: Supp. Figure S5C). Base-pairs removed (C14-C18 with G215-G219) are indicated. Normalized DMS reactivity applies to all structures.

**Supplemental Figure S8. Sufficiency mutants assayed with DMS-MaPseq in live cells**

Related to Figure 6C. For each subfigure:at left, coefficient of determination between DMS signal of this mutant compared to full-length *Insr* 5’UTR across their shared sequence range, considering only signal on As and Cs, calculated in windows (see Methods). Center, mFMI comparison between the predicted structure and full-length. Right, the secondary structure model of the mutant. Indexes in the structures correspond to the mutant UTR, not full-length. **(A)** D1-Solo probed in live cells reveals an intact D1. **(B)** D1D2 cellularmodels a disrupted D2 that is more paired than D2 in the context of the full-length *Insr* 5’UTR. Base-pairs removed (C9-G13 with G109-C113) are indicated. **(C)** D1D2TL probed in live cells, where the tetraloop rescues the structure of D2. Base-pairs removed for clarity (C9-C12 with G214-G217) are shown. **(D)** D1D2TLTL probed in live cells is intact outside of the TL replacements replacing D3 and D4. **(E)** D1TLTLTL replaces D2, D3, and D4. Cellular probing reveals an intact D1 as well as the small hairpin at the base of D3 (G175-C192). Base-pairs removed for clarity (C9-C14 with G225-G230) are shown.

**Supplemental Table S1. Oligonucleotides used in this study**

On sheet 1, all oligonucleotides used to generate mutants are named according to their corresponding mutant and their sequences are listed 5’ to 3’. On sheet 2, all oligonucleotides used for DMS-MaPseq library preparation are specified by their target structure in the first column followed by primer pairs with sequences listed 5’ to 3’.

**Supplemental Table S2. Plasmids used in this study**

Plasmids used for luciferase assay experiments are listed on sheet 1 with their mutation positions and added sequences to form tetraloop hairpins or linear linkers specified. The primers used generate each plasmid with site-directed mutagenesis are listed. Sheet 2 contains the plasmids used for DMS-MaPseq including their mutations and corresponding primers.

**Supplemental Table S3. Luciferase assay raw data**

Raw luciferase assay values collected as described in Methods. Computations of normalized values are included. All data is organized by figure association, with one subfigure per sheet. Columns contain technical replicates while rows are biological replicates.
