# Supplementary material
Source: HighWire-hosted journal article supplement (doi:10.1101/rna.080775.125)
Supplement: Supplemental_Table_S3.xlsx [file Supplemental_Table_S3.xlsx]

## Sheet: Figure 5a – Domain Deletions - 
Supplemental Table S3. Luciferase assay raw data
Luciferase assay raw data for all experiments organized by figure. Each sheet corresponds to one subfigure. The reporter context is listed in each case. Data from Figure 5e is repeated in Supplemental Figure 4a (as specified in the text). FF = Firefly luciferase signal (RLU). Ren = Renilla luciferase signal (RLU). Experiment dates are included for calculation of IRES activity (see Methods for cal…
Figure 5a – Domain Deletions (Bicistronic Reporters in Cells)
Reporter	Exp Date	FF1	FF2	FF3	Ren1	Ren2	Ren3	FF Avg	FF SD	Ren Avg	Ren SD	FF/Ren 1/1	FF/Ren 2/2	FF/Ren 3/3	Avg FF/Ren	SD FF/Ren	FF/Ren for WT (this exp)	FF/Ren/WT	IRES Activity (this exp)	SD as percent Insr	Average IRES Activity	Mean of Technical SDs	SD of IRES Activity
Insr	2021-07-29	14294	14035	12713	17242	15933	15046	13680.7	847.971	16073.7	1104.74	0.829022	0.880876	0.844942	0.851614	0.0216885	0.853781	1	100	2.54029	100	9.64706	0
	2021-08-09	19372	18812	20101	13913	12722	17303	19428.3	646.344	14646	2376.84	1.39237	1.4787	1.16171	1.34426	0.133808	1.3488	1	100	9.92056
	2021-09-17	4649	5255	6412	4025	4514	4962	5438.67	895.736	4500.33	468.649	1.15503	1.16416	1.29222	1.2038	0.062632	1.21738	1	100	5.14484
	2021-10-28	17482	17339	17370	12553	14910	11706	17397	75.2263	13056.3	1660.24	1.39266	1.16291	1.48385	1.34647	0.135033	1.34628	1	100	10.0301
	2022-02-14	4152	4065	4005	3657	4359	3947	4074	73.9121	3987.67	352.762	1.13536	0.932553	1.01469	1.02753	0.0832905	1.02694	1	100	8.11055
	2024-01-26	1164000	1190808	1164651	923921	1069841	1011905	1173153	15293.1	1001889	73473.8	1.25985	1.11307	1.15095	1.17462	0.0622161	1.17522	1	100	5.29397
	2024-02-02	1069676	1028479	1098015	1743051	1715087	1708346	1065390	34965.6	1.72216e+06	18402.3	0.61368	0.599666	0.642736	0.618694	0.0179371	0.618682	1	100	2.89924
	2021-11-01	2066	1932	2015	3764	3338	2731	2004.33	67.6338	3277.67	519.136	0.548884	0.57879	0.737825	0.621833	0.0829224	0.622293	1	100	13.3253
	2024-07-18	96196	114688	108932	322808	504551	423933	106605	9463.01	417097	91064.1	0.297998	0.227307	0.256956	0.260753	0.028984	0.260753	1	100	11.1155
	2022-01-20	2960	2847	2583	1523	1412	1929	2796.67	193.474	1621.33	272.166	1.94353	2.01629	1.33904	1.76629	0.303568	1.76629	1	100	17.1868
BG	2021-09-17	71	72	61	5501	4163	4019	68	6.08276	4561	817.242	0.0129067	0.0172952	0.0151779	0.0151266	0.00179195	1.2174	0.0124254	1.24254	0.147195	2.07574	0.696021	2.28274
	2021-10-28	95	99	94	9032	6800	7200	96	2.64575	7677.33	1190.1	0.0105182	0.0145588	0.0130556	0.0127108	0.00166751	1.3463	0.00944132	0.944132	0.123858
	2021-11-01	47	31	33	1025	1026	1258	37	8.7178	1103	134.235	0.0458537	0.0302144	0.0262321	0.0341001	0.00846857	0.6223	0.0547968	5.47968	1.36085
	2022-01-20	13	11	10	2030	689	880	11.3333	1.52753	1199.67	725.404	0.00640394	0.0159652	0.0113636	0.0112442	0.00390427	1.76629	0.00636604	0.636604	0.221044
HCV	2022-02-14	1296	1466	1555	1951	1834	2298	1439	131.594	2027.67	241.314	0.664275	0.799346	0.676675	0.713432	0.0609608	1.0269	0.694743	69.4743	5.93639	54.2789	9.64824	13.1631
	2024-01-26	524543	678602	608793	906576	1223454	934882	603979	77142.2	1.02164e+06	175350	0.578598	0.554661	0.651198	0.594819	0.0410461	1.1752	0.506143	50.6143	3.49269
	2024-02-02	583638	542747	511265	1494294	1526986	1458575	545883	36288.3	1493285	34216.7	0.390578	0.355437	0.350524	0.365513	0.0178368	0.6223	0.587358	58.7358	2.86627
	2022-01-20	421	642	412	963	573	874	491.667	130.27	803.333	204.378	0.437175	1.12042	0.471396	0.67633	0.314329	1.76629	0.382911	38.2911	17.796
∆D4	2021-07-29	18233	21267	20368	18656	19458	20195	19956	1558.4	19436.3	769.729	0.977326	1.09297	1.00857	1.02629	0.0488457	0.8538	1.20202	120.202	5.72098	98.8533	6.26076	20.8866
	2021-08-09	21119	24289	24829	15470	18511	19338	23412.3	2004.35	17773	2036.87	1.36516	1.31214	1.28395	1.32042	0.0336663	1.3488	0.978956	97.8956	2.49602
	2022-01-20	1040	693	601	874	497	382	778	231.515	584.333	257.364	1.18993	1.39437	1.5733	1.38587	0.156624	1.76629	0.784621	78.4621	8.86744
∆D3	2021-07-29	5910	6419	6635	12151	11806	13615	6321.33	372.237	12524	960.451	0.48638	0.543707	0.48733	0.505805	0.0268029	0.8538	0.592417	59.2417	3.13925	59.515	2.83578	5.70425
	2021-08-09	8947	6384	6576	9825	7750	7296	7302.33	1427.55	8290.33	1348.31	0.910636	0.823742	0.901316	0.878565	0.0389518	1.3488	0.651368	65.1368	2.88788
	2021-09-17	5889	5078	5026	7722	7561	7361	5331	483.941	7548	180.851	0.762626	0.671604	0.682788	0.705673	0.0405302	1.2174	0.579656	57.9656	3.32924
	2021-10-28	3507	2877	2666	4843	4310	4002	3016.67	437.55	4385	425.487	0.724138	0.667517	0.666167	0.685941	0.0270151	1.3463	0.509501	50.9501	2.00662
	2021-10-08	11353	9375	8424	10660	8255	8180	9717.33	1494.21	9031.67	1410.68	1.06501	1.13568	1.02983	1.07684	0.0440137	1.6752	0.642812	64.2812	2.62737
∆D2	2021-07-29	5789	6141	6882	19141	17126	14862	6270.67	557.918	17043	2140.71	0.30244	0.358578	0.46306	0.374693	0.0665557	0.8538	0.438853	43.8853	7.79523	45.0627	5.46543	3.44024
	2021-08-09	5946	6661	7727	8511	10464	11946	6778	896.246	10307	1722.87	0.698625	0.636563	0.646827	0.660672	0.0271622	1.3488	0.489822	48.9822	2.0138
	2021-09-17	3793	3032	3301	8696	6035	6425	3375.33	385.907	7052	1437.04	0.436178	0.502403	0.513774	0.484118	0.0342156	1.2174	0.397666	39.7666	2.81054
	2021-10-28	5150	4141	4275	8667	6805	6867	4522	547.975	7446.33	1057.58	0.594208	0.608523	0.622543	0.608425	0.0115678	1.3463	0.451923	45.1923	0.859229
	2021-11-01	854	607	732	3103	2236	2023	731	123.503	2454	572.052	0.275218	0.271467	0.361839	0.302841	0.0417458	0.6223	0.486648	48.6648	6.70831
	2021-07-29	5789	6141	6882	19141	17126	14862	6270.67	557.918	17043	2140.71	0.30244	0.358578	0.46306	0.374693	0.0665557	0.8538	0.438853	43.8853	7.79523
∆D2∆D3	2021-09-17	3921	3594	4265	7114	6224	7467	3926.67	335.536	6935	640.541	0.551167	0.577442	0.57118	0.566596	0.0112059	1.2174	0.465415	46.5415	0.920475	43.6017	2.52367	2.76418
	2021-10-28	4735	4049	4296	8317	6776	7429	4360	347.449	7507.33	773.481	0.569316	0.59755	0.578274	0.581713	0.0117803	1.3463	0.432083	43.2083	0.875016
	2021-11-01	364	326	298	1426	1134	1332	329.333	33.126	1297.33	149.055	0.255259	0.287478	0.223724	0.255487	0.0260281	0.6223	0.410553	41.0553	4.18256
∆D1	2021-10-28	2430	2863	3727	16445	19657	23025	3006.67	660.327	19709	3290.31	0.147765	0.145648	0.161868	0.15176	0.00719904	1.3463	0.112724	11.2724	0.534727	14.5925	2.04959	5.76492
	2021-11-01	743	599	647	4625	5249	5306	663	73.3212	5060	377.798	0.160649	0.114117	0.121937	0.132234	0.020344	0.6223	0.212493	21.2493	3.26917
	2024-07-18	17858	18602	18701	585374	749452	571492	18387	460.794	635439	98981.5	0.030507	0.0248208	0.0327231	0.0293503	0.00332817	0.260753	0.11256	11.256	1.27637

## Sheet: Figure 5c – TL and US replaceme
Figure 5c – TL and US Domain Replacements (Bicistronic Reporters in Cells)
Reporter	Exp Date	FF1	FF2	FF3	Ren1	Ren2	Ren3	FF Avg	FF SD	Ren Avg	Ren SD	FF/Ren 1/1	FF/Ren 2/2	FF/Ren 3/3	Avg FF/Ren	SD FF/Ren	FF/Ren for WT (this exp)	FF/Ren/WT	IRES Activity (this exp)	SD as percent Insr	Average IRES Activity	Mean of Technical SDs	SD of IRES Activity
Insr	2024-07-08	148026	155515	151409	640083	628014	608523	151650	3750.31	625540	15924.8	0.231261	0.24763	0.248814	0.242568	0.00801021	0.242568	1	100	3.30225	100	7.82005	2.00972e-14
	2024-07-15	145874	145983	156239	603275	609412	714066	149365	5953.02	642251	62269.3	0.241803	0.239547	0.218802	0.233384	0.0103523	0.233384	1	100	4.43574
	2024-07-18	96196	114688	108932	322808	504551	423933	106605	9463.01	417097	91064.1	0.297998	0.227307	0.256956	0.260753	0.028984	0.260753	1	100	11.1155
	2022-06-22	2605	2657	2984	2070	1735	2168	2748.67	205.456	1991	227.053	1.25845	1.53141	1.37638	1.38875	0.111777	1.38875	1	100	8.04876
	2022-07-08	1076	1043	1091	2293	2443	2350	1070	24.5561	2362	75.7166	0.469254	0.426934	0.464255	0.453481	0.0188823	0.453481	1	100	4.16385
	2022-07-12	2189	1556	1840	2673	2379	2583	1861.67	317.056	2545	150.639	0.81893	0.654056	0.71235	0.728445	0.0682648	0.728445	1	100	9.3713
	2022-05-18	1329	1371	1265	910	1057	759	1321.67	53.3791	908.667	149.004	1.46044	1.29707	1.66667	1.47472	0.151226	1.47472	1	100	10.2545
	2022-05-27	2195	2230	2575	1226	1605	1735	2333.33	210.02	1522	264.456	1.79038	1.38941	1.48415	1.55464	0.171115	1.55464	1	100	11.0067
BG	2024-07-08	712	831	850	305708	327639	266968	797.667	74.7953	300105	30721.1	0.00232902	0.00253633	0.0031839	0.00268308	0.000364105	0.242536	0.0110626	1.10626	0.150124	1.87907	1.74207	1.46882
	2024-07-15	1164	1322	1391	552105	632478	550831	1292.33	116.372	578471	46775.5	0.00210829	0.00209019	0.00252528	0.00224125	0.00020097	0.233955	0.00957986	0.957986	0.0859011
	2024-07-18	6884	1831	1227	332836	412067	382576	3314	3106.43	375826	40044.4	0.0206829	0.00444345	0.00320721	0.00944451	0.00796273	0.264333	0.0357296	3.57296	3.01239
HCV	2024-07-08	27516	30029	31815	407341	402250	437647	29786.7	2159.72	415746	19136.9	0.0675503	0.0746526	0.0726956	0.0716328	0.0029953	0.242536	0.295349	29.5349	1.23499	23.5533	1.08156	5.24711
	2024-07-15	21814	22944	23325	465277	470974	427334	22694.3	785.831	454528	23722.6	0.0468839	0.0487161	0.0545826	0.0500609	0.00328368	0.233955	0.213977	21.3977	1.40355
	2024-07-18	13946	14880	14385	265314	287226	276275	14403.7	467.28	276272	10956	0.0525641	0.0518059	0.0520677	0.0521459	0.000314451	0.264333	0.197274	19.7274	0.11896
TL∆D4	2022-07-08	4313	4486	4900	6437	6205	6439	4566.33	301.633	6360.33	134.526	0.670033	0.722965	0.760988	0.717995	0.0372982	0.4533	1.58393	158.393	8.22815	179.515	21.0105	28.7721
	2022-06-22	6670	7686	6720	2555	2438	2181	7025.33	572.7	2391.33	191.317	2.61057	3.15258	3.08116	2.9481	0.240448	1.38875	2.12285	212.285	17.314
	2022-05-27	3997	4561	4699	2051	1566	1550	4419	371.919	1722.33	284.746	1.94881	2.91252	3.03161	2.63098	0.484813	1.5673	1.67867	167.867	30.933
US∆D4	2024-07-08	73937	70940	65488	156460	150864	158714	70121.7	4283.53	155346	4041.83	0.472562	0.470225	0.412616	0.451801	0.0277241	0.242568	1.86257	186.257	11.4294	159.515	9.65047	23.2586
	2024-07-15	120480	120163	119498	333277	366667	342342	120047	501.172	347429	17266.4	0.361501	0.327717	0.34906	0.346093	0.013951	0.233384	1.48293	148.293	5.9777
	2024-07-18	55990	63753	62872	158157	178186	151638	60871.7	4250.53	162660	13835.1	0.354015	0.357789	0.414619	0.375474	0.0277222	0.260753	1.43996	143.996	10.6316
TL∆D3	2022-05-27	2602	2875	3329	2294	2736	2316	2935.33	367.236	2448.67	249.081	1.13426	1.0508	1.43739	1.20749	0.1661	1.5673	0.770425	77.0425	10.5978	82.2145	12.7587	12.026
	2022-07-08	874	918	1025	3254	2140	3201	939	77.6595	2865	628.427	0.268593	0.428972	0.320212	0.339259	0.0668454	0.4533	0.74842	74.842	14.7464
	2022-07-12	3977	3744	3496	4327	6739	4605	3739	240.539	5223.67	1319.66	0.919113	0.555572	0.759175	0.74462	0.148771	0.7333	1.01544	101.544	20.2879
	2022-05-18	5660	5768	6869	4076	4857	5607	6099	669.022	4846.67	765.552	1.38862	1.18756	1.22508	1.26709	0.0872891	1.47472	0.859202	85.9202	5.91901
	2022-06-22	2578	2678	3061	2379	2616	3475	2772.33	254.944	2823.33	576.667	1.08365	1.0237	0.880863	0.996071	0.0850608	1.38875	0.717243	71.7243	6.12499
US∆D3	2024-07-08	41820	39158	34939	141324	129833	116127	38639	3469.74	129095	12614.7	0.295916	0.301603	0.300869	0.299462	0.00252575	0.242568	1.23455	123.455	1.04125	104.566	5.6521	18.2674
	2024-07-15	34821	35457	36575	148093	148225	147139	35617.7	887.969	147819	592.584	0.235129	0.239211	0.248574	0.240971	0.00562842	0.233384	1.03251	103.251	2.41165
	2024-07-18	28242	27787	27793	128530	138312	106951	27940.7	260.98	124598	16046	0.219731	0.200901	0.259867	0.226833	0.0245909	0.260753	0.869913	86.9913	9.43072
D3-TL2	2024-07-08	10933	9689	11252	35786	31913	40602	10624.7	825.86	36100.3	4353.02	0.305511	0.303607	0.277129	0.295415	0.0129537	0.242568	1.21787	121.787	5.34022	94.0642	3.40705	25.3599
	2024-07-15	16755	17066	16882	82791	81370	81703	16901	156.368	81954.7	743.177	0.202377	0.209733	0.206626	0.206246	0.00301522	0.233384	0.883717	88.3717	1.29196
	2024-07-18	7425	7968	8128	41233	41247	42724	7840.33	368.478	41734.7	856.816	0.180074	0.193178	0.190244	0.187832	0.00561483	0.260753	0.720344	72.0344	2.15331
TL∆D2	2022-06-22	1925	1790	1891	3079	2552	2593	1868.67	70.2163	2741.33	293.146	0.625203	0.701411	0.729271	0.685295	0.0439874	1.38875	0.493462	49.3462	3.16741	52.7459	5.40963	7.52953
	2022-07-08	956	962	1257	3970	2887	4823	1058.33	172.077	3893.33	970.274	0.240806	0.333218	0.260626	0.278217	0.0397245	0.4533	0.613758	61.3758	8.76341
	2022-07-12	1755	1566	1918	4942	4627	5453	1746.33	176.16	5007.33	416.858	0.355119	0.338448	0.351733	0.348434	0.00719475	0.7333	0.475158	47.5158	0.981146
US∆D2	2024-07-08	17793	20799	22627	106309	120051	120805	20406.3	2440.81	115722	8160.32	0.167371	0.173251	0.187302	0.175975	0.00836165	0.242568	0.725465	72.5465	3.44713	64.3585	3.20884	8.36337
	2024-07-15	21402	18531	20673	148968	122023	131293	20202	1492.33	134095	13689.2	0.143668	0.151865	0.157457	0.150997	0.00566252	0.233384	0.646988	64.6988	2.42626
	2024-07-18	15917	15190	14300	100416	111514	100697	15135.7	809.868	104209	6327.88	0.158511	0.136216	0.14201	0.145579	0.00944505	0.260753	0.558301	55.8301	3.62221
TL∆D1	2022-06-22	1371	1300	1323	8105	5691	4859	1331.33	36.2261	6218.33	1686.03	0.169155	0.228431	0.272278	0.223288	0.0422567	1.38875	0.160783	16.0783	3.04279	19.6752	2.23261	3.62557
	2024-02-27	201535	208523	209411	3870393	3126368	3373683	206490	4313.78	3.45681e+06	378915	0.0520709	0.0666982	0.0620719	0.0602803	0.00610444	0.258394	0.233288	23.3288	2.36245
	2024-02-24	129667	135303	145920	2158858	2321214	2529640	136963	8252.73	2.33657e+06	185867	0.0600628	0.0582898	0.0576841	0.0586789	0.00100932	0.2991	0.196185	19.6185	0.337452
US∆D1	2024-07-08	11100	11486	9843	321330	343627	301622	10809.7	859.117	322193	21015.8	0.0345439	0.0334258	0.0326336	0.0335344	0.000783678	0.242568	0.138247	13.8247	0.323075	12.8043	0.548778	1.78479
	2024-07-15	16611	16032	17225	512453	523017	508612	16622.7	596.586	514694	7459.39	0.0324147	0.0306529	0.0338667	0.0323114	0.00131404	0.233384	0.138447	13.8447	0.563037
	2024-07-18	12748	12632	12849	500224	436580	433750	12743	108.586	456851	37588.5	0.0254846	0.028934	0.0296231	0.0280139	0.00181047	0.260753	0.107434	10.7434	0.694322
D1-TL3	2024-02-27	481313	480564	481305	2805846	2474167	2755164	481061	430.145	2.67839e+06	178671	0.171539	0.194233	0.174692	0.180155	0.0100375	0.258394	0.697208	69.7208	3.88457	80.4474	4.80208	9.48687
	2024-02-24	317874	295603	295107	1228677	1146110	1250070	302861	13003.7	1.20829e+06	54897.9	0.258712	0.257919	0.236072	0.250901	0.0104905	0.2991	0.838854	83.8854	3.50736
	2022-07-08	3858	3634	3033	10808	8830	7143	3508.33	426.615	8927	1834.42	0.356958	0.411552	0.424612	0.397707	0.0293031	0.4533	0.877359	87.7359	6.4644

## Sheet: Figure 6a – All So
Figure 6a – All Solo Domain Sufficiency (Bicistronic Reporters in Cells)
Reporter	Exp Date	FF1	FF2	FF3	Ren1	Ren2	Ren3	FF Avg	FF SD	Ren Avg	Ren SD	FF/Ren 1/1	FF/Ren 2/2	FF/Ren 3/3	Avg FF/Ren	SD FF/Ren	FF/Ren for WT (this exp)	FF/Ren/WT	IRES Activity (this exp)	SD as percent Insr	Average IRES Activity	Mean of Technical SDs	SD of IRES Activity
Insr	2/16/23	558324	490307	465289	284796	252920	245808	504640	48145.1	261175	20763.4	1.96043	1.93859	1.8929	1.93064	0.0281393	1.93064	1	100	1.45751	100	7.94065	0
	10/22/21	15267	15953	16699	6963	8904	7734	15973	716.209	7867	977.311	2.19259	1.79167	2.15917	2.04781	0.181632	2.04781	1	100	8.8696
	2/2/24	1069676	1028479	1098015	1743051	1715087	1708346	1065390	34965.6	1.72216e+06	18402.3	0.61368	0.599666	0.642736	0.618694	0.0179371	0.618694	1	100	2.89918
	1/26/24	1164000	1190808	1164651	923921	1069841	1011905	1173153	15293.1	1001889	73473.8	1.25985	1.11307	1.15095	1.17462	0.0622161	1.17462	1	100	5.29669
	5/18/22	1611	1989	1630	843	1236	1236	1743.33	212.966	1105	226.899	1.91103	1.60922	1.31877	1.61301	0.241805	1.61301	1	100	14.9909
	2/24/24	413152	393413	368033	1355745	1323165	1252442	391533	22618.2	1.31045e+06	52812.1	0.304742	0.297327	0.293852	0.29864	0.0045415	0.29864	1	100	1.52072
	7/8/22	1076	1043	1091	2293	2443	2350	1070	24.5561	2362	75.7166	0.469254	0.426934	0.464255	0.453481	0.0188823	0.453481	1	100	4.16385
	11/1/21	2066	1932	2015	3764	3338	2731	2004.33	67.6338	3277.67	519.136	0.548884	0.57879	0.737825	0.621833	0.0829224	0.621833	1	100	13.3352
	2024-07-08	148026	155515	151409	640083	628014	608523	151650	3750.31	625540	15924.8	0.231261	0.24763	0.248814	0.242568	0.00801021	0.242568	1	100	3.30225
	2024-07-15	145874	145983	156239	603275	609412	714066	149365	5953.02	642251	62269.3	0.241803	0.239547	0.218802	0.233384	0.0103523	0.233384	1	100	4.43574
	2024-07-18	96196	114688	108932	322808	504551	423933	106605	9463.01	417097	91064.1	0.297998	0.227307	0.256956	0.260753	0.028984	0.260753	1	100	11.1155
BG	2/16/23	5055	5955	5105	336653	383355	343703	5371.67	505.8	354570	25176.2	0.0150155	0.0155339	0.0148529	0.0151341	0.000290385	1.93064	0.00783891	0.783891	0.0150409	0.856148	0.137035	0.312602
	2/24/24	2772	3683	3272	907431	1038470	903718	3242.33	456.224	949873	76749.7	0.00305478	0.00354656	0.0036206	0.00340731	0.000251106	0.29864	0.0114094	1.14094	0.084083
	10/22/21	88	93	95	5506	3243	4737	92	3.60555	4495.33	1150.69	0.0159826	0.0286772	0.0200549	0.0215715	0.00529234	2.04781	0.010534	1.0534	0.258439
	1/26/24	3178	3036	3482	658167	588266	606654	3232	227.851	617696	36235	0.00482856	0.00516093	0.00573968	0.00524306	0.000376469	1.17462	0.00446361	0.446361	0.0320502
D4-Solo	2/16/23	7205	7238	4900	474988	428311	315388	6447.67	1340.42	406229	82059.4	0.0151688	0.0168989	0.0155364	0.0158681	0.000744233	1.93064	0.00821907	0.821907	0.0385485	1.22879	0.0500138	0.680506
	10/22/21	159	175	115	9563	12668	8254	149.667	31.0698	10161.7	2267.08	0.0166266	0.0138143	0.0139326	0.0147912	0.00129872	2.04781	0.00722294	0.722294	0.06342
	2/24/24	3938	3562	3460	1113801	995251	1052480	3653.33	251.749	1053844	59286.8	0.00353564	0.003579	0.00328747	0.00346737	0.000128432	0.29864	0.0116105	1.16105	0.0430055
	11/1/21	46	41	51	3241	3010	3794	46	5	3348.33	402.87	0.0141932	0.0136213	0.0134423	0.0137522	0.000320226	0.6223	0.022099	2.2099	0.0514584
D3-Solo	2/16/23	6572	10497	5810	547004	482312	539771	7626.33	2515.1	523029	35446.9	0.0120145	0.0217639	0.0107638	0.0148474	0.00491728	1.93064	0.00769042	0.769042	0.254697	1.16574	0.685945	0.667142
	2/24/24	9300	3839	3971	872410	1166904	1169755	5703.33	3115.5	1.06969e+06	170855	0.0106601	0.0032899	0.00339473	0.00578159	0.00344991	0.29864	0.0193597	1.93597	1.15521
	10/22/21	41	39	42	3090	2079	2524	40.6667	1.52753	2564.33	506.705	0.0132686	0.018759	0.0166403	0.0162226	0.00226082	2.04781	0.00792195	0.792195	0.110402
D2-Solo	2/16/23	14077	13698	12162	395608	332980	279569	13312.3	1014.08	336052	58080.5	0.0355832	0.0411376	0.0435027	0.0400745	0.00331935	1.93064	0.0207571	2.07571	0.17193	3.22204	0.256191	1.01098
	2/24/24	9066	9607	9536	671894	905082	817690	9403	294.002	798222	117807	0.0134932	0.0106145	0.0116621	0.0119233	0.00118964	0.299106	0.0398631	3.98631	0.397733
	11/1/21	57	48	45	2562	2204	1939	50	6.245	2235	312.655	0.0222482	0.0217786	0.0232078	0.0224116	0.000594808	0.621833	0.0360411	3.60411	0.095654
D1-Solo	2/16/23	19143	24272	23048	81216	110060	111509	22154.3	2678.74	100928	17086.7	0.235705	0.220534	0.206692	0.220977	0.0118486	1.93064	0.114458	11.4458	0.613715	9.74627	0.799658	1.84537
	1/26/24	1541	1788	1863	14438	16558	13499	1730.67	168.482	14831.7	1567.04	0.106732	0.107984	0.13801	0.117576	0.0144586	1.17462	0.100096	10.0096	1.23091
	2/2/24	5341	5266	5360	108161	109309	114261	5322.33	49.7024	110577	3241.66	0.0493801	0.0481754	0.0469101	0.0481552	0.00100845	0.618694	0.0778336	7.78336	0.162997

## Sheet: Figure 6b – Sufficiency Mutants
Figure 6b – Sufficiency Mutants (Bicistronic Reporters in Cells)
Reporter	Exp Date	FF1	FF2	FF3	Ren1	Ren2	Ren3	FF Avg	FF SD	Ren Avg	Ren SD	FF/Ren 1/1	FF/Ren 2/2	FF/Ren 3/3	Avg FF/Ren	SD FF/Ren	FF/Ren for WT (this exp)	FF/Ren/WT	IRES Activity (this exp)	SD as percent Insr	Average IRES Activity	Mean of Technical SDs	SD of IRES Activity
Insr	2022-05-18	1611	1989	1630	843	1236	1236	1743.33	212.966	1105	226.899	1.91103	1.60922	1.31877	1.61301	0.241805	1.61301	1	100	14.9909	100	8.2108	0
	2022-07-12	2189	1556	1840	2673	2379	2583	1861.67	317.056	2545	150.639	0.81893	0.654056	0.71235	0.728445	0.0682648	0.728445	1	100	9.3713
	2022-05-27	2195	2230	2575	1226	1605	1735	2333.33	210.02	1522	264.456	1.79038	1.38941	1.48415	1.55464	0.171115	1.55464	1	100	11.0067
	2024-02-02	1069676	1028479	1098015	1743051	1715087	1708346	1065390	34965.6	1.72216e+06	18402.3	0.61368	0.599666	0.642736	0.618694	0.0179371	0.618694	1	100	2.89918
	2024-01-26	1164000	1190808	1164651	923921	1069841	1011905	1173153	15293.1	1001889	73473.8	1.25985	1.11307	1.15095	1.17462	0.0622161	1.17462	1	100	5.29669
	7/8/2022	1076	1043	1091	2293	2443	2350	1070	24.5561	2362	75.7166	0.469254	0.426934	0.464255	0.453481	0.0188823	0.453481	1	100	4.16385
	2022-10-14	18470	17310	22497	9741	12073	12348	19425.7	2722.35	11387.3	1432.38	1.89611	1.43378	1.82191	1.71727	0.202733	1.71727	1	100	11.8055
	2024-02-24	413152	393413	368033	1355745	1323165	1252442	391533	22618.2	1.31045e+06	52812.1	0.304742	0.297327	0.293852	0.29864	0.0045415	0.29864	1	100	1.52072
	2024-02-27	609360	583055	528884	2264933	2143595	2258806	573766	41034.2	2.22244e+06	68354.5	0.269041	0.271999	0.234143	0.258394	0.0171906	0.258394	1	100	6.65285
	2022-08-29	3811	4932	4170	2002	2400	2087	4304.33	572.446	2163	209.602	1.9036	2.055	1.99808	1.98556	0.0624414	1.98556	1	100	3.14477
	2023-02-16	558324	490307	465289	284796	252920	245808	504640	48145.1	261175	20763.4	1.96043	1.93859	1.8929	1.93064	0.0281393	1.93064	1	100	1.45751
	2024-07-18	96196	114688	108932	322808	504551	423933	106605	9463.01	417097	91064.1	0.297998	0.227307	0.256956	0.260753	0.028984	0.260753	1	100	11.1155
D1-Solo	2023-02-16	19143	24272	23048	81216	110060	111509	22154.3	2678.74	100928	17086.7	0.235705	0.220534	0.206692	0.220977	0.0118486	1.93064	0.114458	11.4458	0.613715	9.74627	0.799658	1.84537
	2024-01-26	1541	1788	1863	14438	16558	13499	1730.67	168.482	14831.7	1567.04	0.106732	0.107984	0.13801	0.117576	0.0144586	1.17462	0.100096	10.0096	1.23091
	2024-02-02	5341	5266	5360	108161	109309	114261	5322.33	49.7024	110577	3241.66	0.0493801	0.0481754	0.0469101	0.0481552	0.00100845	0.618694	0.0778336	7.78336	0.162997
Cons-Solo	7/8/24	2240	2327	2679	32596	32471	38347	2415.33	232.449	34471.3	3357.01	0.0687201	0.0716639	0.069862	0.070082	0.00121185	0.242568	0.288917	28.8917	0.499591	27.5743	4.39737	1.28692
	7/15/24	5479	5659	6174	83571	103316	96549	5770.67	360.705	94478.7	10034	0.065561	0.0547737	0.0639468	0.0614272	0.00475064	0.233384	0.263202	26.3202	2.03555
	7/18/24	3137	258	2855	59039	2633	44550	2083.33	1587.06	35407.3	29293.4	0.0531344	0.0979871	0.0640853	0.0717356	0.0190934	0.260753	0.275109	27.5109	7.3224
D1D2	2022-05-18	6720	6619	7513	6821	5948	6352	6950.67	489.606	6373.67	436.903	0.985193	1.11281	1.18278	1.09359	0.0818	1.61301	0.677984	67.7984	5.07127	48.5036	3.45896	14.4909
	2022-07-08	561	457	413	3516	3112	2958	477	76	3195.33	288.183	0.159556	0.146851	0.139621	0.148676	0.00824012	0.453481	0.327855	32.7855	1.81708
	2024-02-27	138460	135389	140857	1089601	1112593	1131532	138235	2740.91	1111242	20998.1	0.127074	0.121688	0.124483	0.124415	0.00219945	0.2583	0.481669	48.1669	0.851511
	2022-05-27	1368	1612	1526	2242	2156	2026	1502	123.758	2141.33	108.744	0.610169	0.747681	0.753208	0.703686	0.0661648	1.55464	0.452635	45.2635	4.25594
D1D2TL	2022-07-12	2195	2289	2373	5061	5910	5128	2285.67	89.0468	5366.33	472.019	0.433709	0.38731	0.462754	0.427924	0.0310703	0.728445	0.587448	58.7448	4.26528	77.6414	6.35548	11.2774
	2022-07-08	1869	2036	2051	5271	5323	5608	1985.33	101.026	5400.67	181.429	0.354582	0.382491	0.365728	0.3676	0.0114706	0.453481	0.810618	81.0618	2.52946
	2022-08-29	11659	12687	10320	6812	8322	6525	11555.3	1186.9	7219.67	965.374	1.71154	1.52451	1.58161	1.60589	0.0782588	1.98556	0.808783	80.8783	3.9414
	2024-02-27	249656	246054	243533	1082718	1263757	921581	246414	3077.36	1089352	171184	0.230583	0.1947	0.264256	0.229846	0.0284006	0.2583	0.889842	88.9842	10.9952
	2022-10-14	8675	9104	9159	6782	6024	7183	8979.33	264.991	6663	588.592	1.27912	1.51129	1.27509	1.35517	0.110406	1.7255	0.785377	78.5377	6.3985
D1D2TLTL	2022-07-12	3328	2976	2846	5612	4133	4388	3050	249.375	4711	790.637	0.593015	0.720058	0.648587	0.653887	0.0520003	0.728445	0.897647	89.7647	7.13854	87.1489	3.84381	2.16284
	2022-10-14	4981	4546	5022	3370	2920	3407	4849.67	263.781	3232.33	271.121	1.47804	1.55685	1.47402	1.50297	0.0381326	1.71727	0.875211	87.5211	2.22054
	2024-02-27	183427	190858	184478	818930	838837	833644	186254	4021.38	830470	10326	0.223984	0.227527	0.221291	0.224267	0.00255364	0.258394	0.867926	86.7926	0.988274
	2024-07-18	39875	41118	40481	184700	182428	184121	40491.3	621.564	183750	1180.64	0.215891	0.225393	0.219861	0.220382	0.00389677	0.260753	0.845172	84.5172	1.49443
D1TLTLTL	2024-02-24	46448	45632	48129	460008	449988	465786	46736.3	1273.23	458594	7993.36	0.100972	0.101407	0.103329	0.101903	0.00102381	0.29864	0.341222	34.1222	0.342825	28.2333	1.28181	5.58785
	2024-02-27	41359	39110	41724	679348	653294	724543	40731	1415.64	685728	36050.5	0.0608804	0.0598658	0.0575866	0.0594443	0.00137732	0.258394	0.230053	23.0053	0.533032
	2024-02-02	88465	92335	107092	552592	568142	566167	95964	9829.47	562300	8465.46	0.160091	0.162521	0.189153	0.170588	0.0131645	0.618694	0.275723	27.5723	2.12779

## Sheet: Figure 6d – Sufficiency Mutants
Figure 6d – Sufficiency Mutants In Vitro Translation (Monocistronic Reporters In Vitro)
Name	Replicate	Cap1	Cap2	Cap3	Mock1	Mock2	Mock3	Cap1:Mock1	Cap1:Mock2	Cap1:Mock3	Cap2:Mock1	Cap2:Mock2	Cap2:Mock3	Cap3:Mock1	Cap3:Mock2	Cap3:Mock3	Technical SD Cap:Mock	Technical Average Cap:Mock	Biological SD Mean Cap:Mock	Biological Average Cap:Mock
BG	1	492228	463264	487013	1492237	1570171	1303168	0.329859	0.313487	0.377716	0.310449	0.29504	0.355491	0.326364	0.310166	0.373715	0.0297198	0.332476	0.0285037	0.3117
	2	346117	328187	302484	1101916	1231425	1040639	0.314105	0.28107	0.3326	0.297833	0.26651	0.315371	0.274507	0.245637	0.290671	0.0272333	0.290923
HCV	1	1215283	1110596	1230490	1254307	954362	983965	0.968888	1.2734	1.23509	0.885426	1.16371	1.12869	0.981012	1.28933	1.25054	0.150262	1.13068	0.121805	1.13221
	2	858484	872003	936667	845479	732270	782905	1.01538	1.17236	1.09654	1.03137	1.19082	1.1138	1.10785	1.27913	1.1964	0.0842268	1.13374
INSR	1	80454	98009	101166	87008	92884	85386	0.924674	0.866177	0.942239	1.12644	1.05518	1.14783	1.16272	1.08916	1.18481	0.116563	1.05547	0.133485	0.952299
	2	101921	99233	101234	110290	153852	103030	0.924118	0.662461	0.989236	0.899746	0.64499	0.963147	0.917889	0.657996	0.982568	0.148492	0.849128
∆D1	1	38786	35533	37771	95221	101347	93736	0.407326	0.382705	0.413779	0.373163	0.350607	0.379075	0.396667	0.37269	0.402951	0.020243	0.386552	0.0333822	0.441878
	2	58115	52021	60641	112676	122787	108889	0.515771	0.473299	0.533709	0.461687	0.423669	0.477743	0.538189	0.493872	0.556907	0.0426493	0.497205
D1-Solo	1	966606	809942	788586	1606547	1562737	1500041	0.601667	0.618534	0.644386	0.504151	0.518284	0.539947	0.490858	0.504618	0.52571	0.056603	0.549795	0.0531255	0.480301
	2	523050	427725	409714	1091051	1074173	1149284	0.4794	0.486933	0.455109	0.39203	0.39819	0.372166	0.375522	0.381423	0.356495	0.0494039	0.410808
D1D2	1	335509	325264	349256	809267	813141	765375	0.414584	0.412609	0.438359	0.401924	0.400009	0.424973	0.431571	0.429515	0.45632	0.0180852	0.423318	0.0204462	0.411372
	2	277487	245191	258755	650224	665925	640734	0.426756	0.416694	0.433077	0.377087	0.368196	0.382672	0.397947	0.388565	0.403842	0.0225615	0.399426
D1D2TL	1	292446	270230	297377	530347	610802	567648	0.551424	0.47879	0.515189	0.509534	0.442418	0.476052	0.560722	0.486863	0.523876	0.0379326	0.504985	0.0330429	0.451453
	2	202739	190887	194364	502438	524526	455802	0.40351	0.386518	0.444796	0.379922	0.363923	0.418794	0.386842	0.370552	0.426422	0.0272906	0.39792
D1D2TLTL	1	317767	351909	317343	318370	328265	331626	0.998106	0.96802	0.958209	1.10535	1.07203	1.06116	0.996774	0.966728	0.95693	0.0559025	1.00926	0.0662609	0.931505
	2	230420	259651	258442	277485	320564	282318	0.830387	0.718796	0.816172	0.93573	0.809982	0.919711	0.931373	0.80621	0.915429	0.0752059	0.853754

## Sheet: Supplemental Figure 5a – All TL
Supplemental Figure 5a – All TL Hairpins (Bicistronic Reporters in Cells)
Reporter	Exp Date	FF1	FF2	FF3	Ren1	Ren2	Ren3	FF Avg	FF SD	Ren Avg	Ren SD	FF/Ren 1/1	FF/Ren 2/2	FF/Ren 3/3	Avg FF/Ren	SD FF/Ren	FF/Ren for WT (this exp)	FF/Ren/WT	IRES Activity (this exp)	SD as percent Insr	Average IRES Activity	Mean of Technical SDs	SD of IRES Activity
Insr	2022-07-08	1076	1043	1091	2293	2443	2350	1070	24.5561	2362	75.7166	0.469254	0.426934	0.464255	0.453481	0.0188823	0.453481	1	100	4.16385	100	7.72627	0
	2022-05-18	1329	1371	1265	910	1057	759	1321.67	53.3791	908.667	149.004	1.46044	1.29707	1.66667	1.47472	0.151226	1.47472	1	100	10.2545
	2022-06-22	2605	2657	2984	2070	1735	2168	2748.67	205.456	1991	227.053	1.25845	1.53141	1.37638	1.38875	0.111777	1.38875	1	100	8.04876
	2022-05-27	2195	2230	2575	1226	1605	1735	2333.33	210.02	1522	264.456	1.79038	1.38941	1.48415	1.55464	0.171115	1.55464	1	100	11.0067
	2022-07-12	2189	1556	1840	2673	2379	2583	1861.67	317.056	2545	150.639	0.81893	0.654056	0.71235	0.728445	0.0682648	0.728445	1	100	9.3713
	2024-02-27	609360	583055	528884	2264933	2143595	2258806	573766	41034.2	2.22244e+06	68354.5	0.269041	0.271999	0.234143	0.258394	0.0171906	0.258394	1	100	6.65285
	2024-02-24	413152	393413	368033	1355745	1323165	1252442	391533	22618.2	1.31045e+06	52812.1	0.304742	0.297327	0.293852	0.29864	0.0045415	0.29864	1	100	1.52072
	2024-07-08	148026	155515	151409	640083	628014	608523	151650	3750.31	625540	15924.8	0.231261	0.24763	0.248814	0.242568	0.00801021	0.242568	1	100	3.30225
	2024-07-15	145874	145983	156239	603275	609412	714066	149365	5953.02	642251	62269.3	0.241803	0.239547	0.218802	0.233384	0.0103523	0.233384	1	100	4.43574
	2024-07-18	96196	114688	108932	322808	504551	423933	106605	9463.01	417097	91064.1	0.297998	0.227307	0.256956	0.260753	0.028984	0.260753	1	100	11.1155
D1-TL1	2024-07-08	23284	22800	22045	139267	134969	129403	22709.7	624.42	134546	4945.56	0.16719	0.168928	0.170359	0.168826	0.00129601	0.242568	0.695992	69.5992	0.534286	65.8022	5.4726	4.42383
	2024-07-15	32320	33615	28188	219055	205089	179890	31374.3	2834.4	201345	19849.2	0.147543	0.163904	0.156696	0.156048	0.00669529	0.233384	0.66863	66.863	2.86879
	2024-07-18	22719	22537	10493	124498	134591	82745	18583	7006.74	113945	27486.9	0.182485	0.167448	0.126811	0.158915	0.0235159	0.260753	0.609444	60.9444	9.01846
D1-TL2	2022-06-22	6351	6029	5882	6332	5887	4891	6087.33	239.88	5703.33	737.848	1.003	1.02412	1.20262	1.07658	0.0895381	1.38875	0.775215	77.5215	6.44739	81.1897	7.89262	12.8406
	2022-05-18	5598	4829	4426	5068	5256	4025	4951	595.449	4783	663.143	1.10458	0.91876	1.09963	1.04099	0.0864524	1.4814	0.702706	70.2706	5.83585
	2024-02-27	383393	396974	384049	1822811	1863037	1811297	388139	7658.65	1.83238e+06	27165.3	0.210331	0.213079	0.21203	0.211813	0.00113241	0.258394	0.819728	81.9728	0.438251
	2024-02-24	65295	58294	55092	324457	225988	276100	59560.3	5218.05	275515	49237.1	0.201244	0.257952	0.199536	0.219577	0.0271437	0.2991	0.734127	73.4127	9.07514
	2022-07-08	3314	3053	3010	8560	5939	6064	3125.67	164.512	6854.33	1478.47	0.38715	0.51406	0.496372	0.46586	0.0561234	0.4533	1.02771	102.771	12.3811
D1-TL3	2024-02-27	481313	480564	481305	2805846	2474167	2755164	481061	430.145	2.67839e+06	178671	0.171539	0.194233	0.174692	0.180155	0.0100375	0.258394	0.697208	69.7208	3.88457	80.4474	4.80208	9.48687
	2024-02-24	317874	295603	295107	1228677	1146110	1250070	302861	13003.7	1.20829e+06	54897.9	0.258712	0.257919	0.236072	0.250901	0.0104905	0.2991	0.838854	83.8854	3.50736
	2022-07-08	3858	3634	3033	10808	8830	7143	3508.33	426.615	8927	1834.42	0.356958	0.411552	0.424612	0.397707	0.0293031	0.4533	0.877359	87.7359	6.4644
TL∆D1	2022-06-22	1371	1300	1323	8105	5691	4859	1331.33	36.2261	6218.33	1686.03	0.169155	0.228431	0.272278	0.223288	0.0422567	1.38875	0.160783	16.0783	3.04279	19.6752	2.23261	3.62557
	2024-02-27	201535	208523	209411	3870393	3126368	3373683	206490	4313.78	3.45681e+06	378915	0.0520709	0.0666982	0.0620719	0.0602803	0.00610444	0.258394	0.233288	23.3288	2.36245
	2024-02-24	129667	135303	145920	2158858	2321214	2529640	136963	8252.73	2.33657e+06	185867	0.0600628	0.0582898	0.0576841	0.0586789	0.00100932	0.2991	0.196185	19.6185	0.337452
D2-TL1	2022-05-27	2602	2875	3329	2294	2736	2316	2935.33	367.236	2448.67	249.081	1.13426	1.0508	1.43739	1.20749	0.1661	1.5673	0.770425	77.0425	10.5978	105.673	8.94623	21.6793
	2022-07-08	2839	2546	2459	5392	4357	3765	2614.67	199.089	4504.67	823.49	0.526521	0.584347	0.653121	0.587996	0.0517486	0.4533	1.29715	129.715	11.416
	2022-06-22	2973	3194	3393	2146	1988	2196	3186.67	210.096	2110	108.573	1.38537	1.60664	1.54508	1.51236	0.0932494	1.38875	1.08901	108.901	6.71463
	2022-05-18	7535	7835	8891	5159	4750	5470	8087	712.258	5126.33	361.11	1.46055	1.64947	1.62541	1.57848	0.0839625	1.47472	1.07036	107.036	5.69344
D2-TL2	2022-05-27	1092	943	993	1195	1846	1450	1009.33	75.831	1497	328.035	0.913808	0.510834	0.684828	0.703156	0.165023	1.5673	0.448642	44.8642	10.5291	74.4048	12.2084	27.0686
	2022-07-08	2106	2312	2391	4606	6163	4360	2269.67	147.141	5043	977.716	0.45723	0.375142	0.548394	0.460255	0.0707624	0.4533	1.01534	101.534	15.6105
	2022-06-22	5500	5307	5371	3823	4974	4278	5392.67	98.3073	4358.33	579.69	1.43866	1.06695	1.25549	1.2537	0.151756	1.38875	0.902755	90.2755	10.9275
	2022-05-18	3639	3244	3136	5540	4560	4850	3339.67	264.795	4983.33	503.422	0.656859	0.711404	0.646598	0.67162	0.0284412	1.47472	0.455421	45.5421	1.92858
	2022-07-12	3524	3581	3577	5164	7145	4516	3560.67	31.8172	5608.33	1369.67	0.682417	0.50119	0.792073	0.65856	0.119945	0.7333	0.898077	89.8077	16.3568
D2-TL3	2024-07-08	40998	42357	39676	211573	207802	202884	41010.3	1340.54	207420	4357.1	0.193777	0.203833	0.19556	0.197724	0.00438126	0.242568	0.815126	81.5126	1.8062	73.6348	3.24882	9.34321
	2024-07-15	40682	41217	40472	233737	242160	214800	40790.3	384.133	230232	14012.7	0.17405	0.170206	0.188417	0.177558	0.00783755	0.233384	0.760796	76.0796	3.35822
	2024-07-18	30758	30207	31040	183717	170677	205750	30668.3	423.677	186715	17727.6	0.167421	0.176983	0.150863	0.165089	0.0107904	0.260753	0.633123	63.3123	4.13818
TL∆D2	2022-06-22	1925	1790	1891	3079	2552	2593	1868.67	70.2163	2741.33	293.146	0.625203	0.701411	0.729271	0.685295	0.0439874	1.38875	0.493462	49.3462	3.16741	52.7459	5.40963	7.52953
	2022-07-08	956	962	1257	3970	2887	4823	1058.33	172.077	3893.33	970.274	0.240806	0.333218	0.260626	0.278217	0.0397245	0.4533	0.613758	61.3758	8.76341
	2022-07-12	1755	1566	1918	4942	4627	5453	1746.33	176.16	5007.33	416.858	0.355119	0.338448	0.351733	0.348434	0.00719475	0.7333	0.475158	47.5158	0.981146
D3-TL1	2024-07-08	46999	47199	57891	161263	171595	199653	50696.3	6231.57	177504	19865.4	0.291443	0.27506	0.289958	0.285487	0.00739773	0.242568	1.17694	117.694	3.04975	101.38	4.45978	14.4787
	2024-07-15	49694	49951	46501	213872	222792	213000	48715.3	1921.97	216555	5419.26	0.232354	0.224205	0.218315	0.224958	0.00575624	0.233384	0.963894	96.3894	2.46642
	2024-07-18	37291	38105	39339	156232	150091	185644	38245	1031.15	163989	19003.5	0.23869	0.253879	0.211906	0.234825	0.0173523	0.260753	0.900563	90.0563	6.65467
D3-TL2	2024-07-08	10933	9689	11252	35786	31913	40602	10624.7	825.86	36100.3	4353.02	0.305511	0.303607	0.277129	0.295415	0.0129537	0.242568	1.21787	121.787	5.34022	94.0642	3.40705	25.3599
	2024-07-15	16755	17066	16882	82791	81370	81703	16901	156.368	81954.7	743.177	0.202377	0.209733	0.206626	0.206246	0.00301522	0.233384	0.883717	88.3717	1.29196
	2024-07-18	7425	7968	8128	41233	41247	42724	7840.33	368.478	41734.7	856.816	0.180074	0.193178	0.190244	0.187832	0.00561483	0.260753	0.720344	72.0344	2.15331
D3-TL3	2022-05-27	1578	1556	1829	1341	874	1115	1654.33	151.665	1110	233.54	1.17673	1.78032	1.64036	1.53247	0.257952	1.5673	0.977778	97.7778	16.4584	90.7297	14.3273	13.4169
	2022-07-08	2887	2859	2881	4765	7018	6973	2875.67	14.7422	6252	1287.98	0.605876	0.407381	0.413165	0.475474	0.0922384	0.4533	1.04892	104.892	20.3482
	2022-05-18	5070	5269	6209	4750	4215	4197	5516	608.348	4387.33	314.207	1.06737	1.25006	1.47939	1.26561	0.168566	1.47472	0.858198	85.8198	11.4303
	2022-06-22	5422	5083	5120	5231	5122	4776	5208.33	185.963	5043	237.565	1.03651	0.992386	1.07203	1.03364	0.0325766	1.38875	0.744297	74.4297	2.34575
TL∆D3	2022-05-27	2602	2875	3329	2294	2736	2316	2935.33	367.236	2448.67	249.081	1.13426	1.0508	1.43739	1.20749	0.1661	1.5673	0.770425	77.0425	10.5978	82.2145	12.7587	12.026
	2022-07-08	874	918	1025	3254	2140	3201	939	77.6595	2865	628.427	0.268593	0.428972	0.320212	0.339259	0.0668454	0.4533	0.74842	74.842	14.7464
	2022-07-12	3977	3744	3496	4327	6739	4605	3739	240.539	5223.67	1319.66	0.919113	0.555572	0.759175	0.74462	0.148771	0.7333	1.01544	101.544	20.2879
	2022-05-18	5660	5768	6869	4076	4857	5607	6099	669.022	4846.67	765.552	1.38862	1.18756	1.22508	1.26709	0.0872891	1.47472	0.859202	85.9202	5.91901
	2022-06-22	2578	2678	3061	2379	2616	3475	2772.33	254.944	2823.33	576.667	1.08365	1.0237	0.880863	0.996071	0.0850608	1.38875	0.717243	71.7243	6.12499
D4-TL1	2022-07-08	4225	3929	3680	8355	6785	6692	3944.67	272.838	7277.33	934.444	0.505685	0.579071	0.54991	0.544889	0.0301695	0.4533	1.20205	120.205	6.65552	102.425	9.09454	19.2556
	2022-06-22	6229	5432	6528	5265	3487	3986	6063	566.543	4246	917.072	1.1831	1.55779	1.63773	1.45954	0.19818	1.38875	1.05097	105.097	14.2704
	2024-02-27	383393	396974	384049	1822811	1863037	1811297	388139	7658.65	1.83238e+06	27165.3	0.210331	0.213079	0.21203	0.211813	0.00113241	0.258394	0.819728	81.9728	0.438251
TL∆D4	2022-07-08	4313	4486	4900	6437	6205	6439	4566.33	301.633	6360.33	134.526	0.670033	0.722965	0.760988	0.717995	0.0372982	0.4533	1.58393	158.393	8.22815	179.515	11.5079	28.7721
	2022-06-22	6670	7686	6720	2555	2438	2181	7025.33	572.7	2391.33	191.317	2.61057	3.15258	3.08116	2.9481	0.240448	1.38875	2.12285	212.285	17.314
	2022-05-27	3997	4561	4699	2051	1566	1550	4419	371.919	1722.33	284.746	1.94881	2.91252	3.03161	2.63098	0.484813	1.5673	1.67867	167.867	30.933
